# Supplementary material
Source: PubMed Central journal article supplement (PMC3811743)
Supplement: IAI.00660-13_zii999090340so1.pdf [file IAI.00660-13_zii999090340so1.pdf]

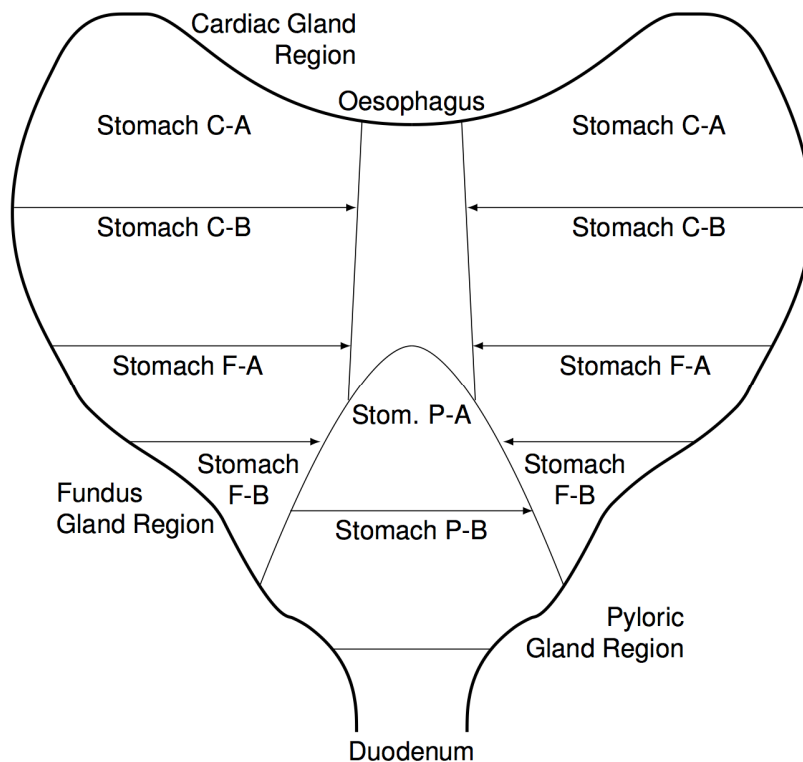

**FIG S1 Schematic overview of the porcine stomach.**

The stomach was divided into 3 main regions: the cardiac gland (C), fundus gland (F) and pyloric gland (P) region. These regions were further divided into 2 subregions (A, B), which were collected separately for histology and bacterial re-isolation. The scheme was modified from Koga et al. (1).

1. **Koga T, Shimada Y, Sato K, Takahashi K, Kikuchi, Miura T, Takenouchi T, Narita T, Iwata M.** 2002. Experimental *Helicobacter pylori* gastric infection in miniature pigs. *J. Med. Microbiol.* **51**:238-246.
